# Supplementary material for: Free, Conjugated, and Bound Phenolics in Peel and Pulp from Four Wampee Varieties: Relationship between Phenolic Composition and Bio-Activities by Multivariate Analysis
Source: MDPI journal article supplement (doi:10.3390/antiox11091831), 2022-09-16
Supplement: s1 [file s1]

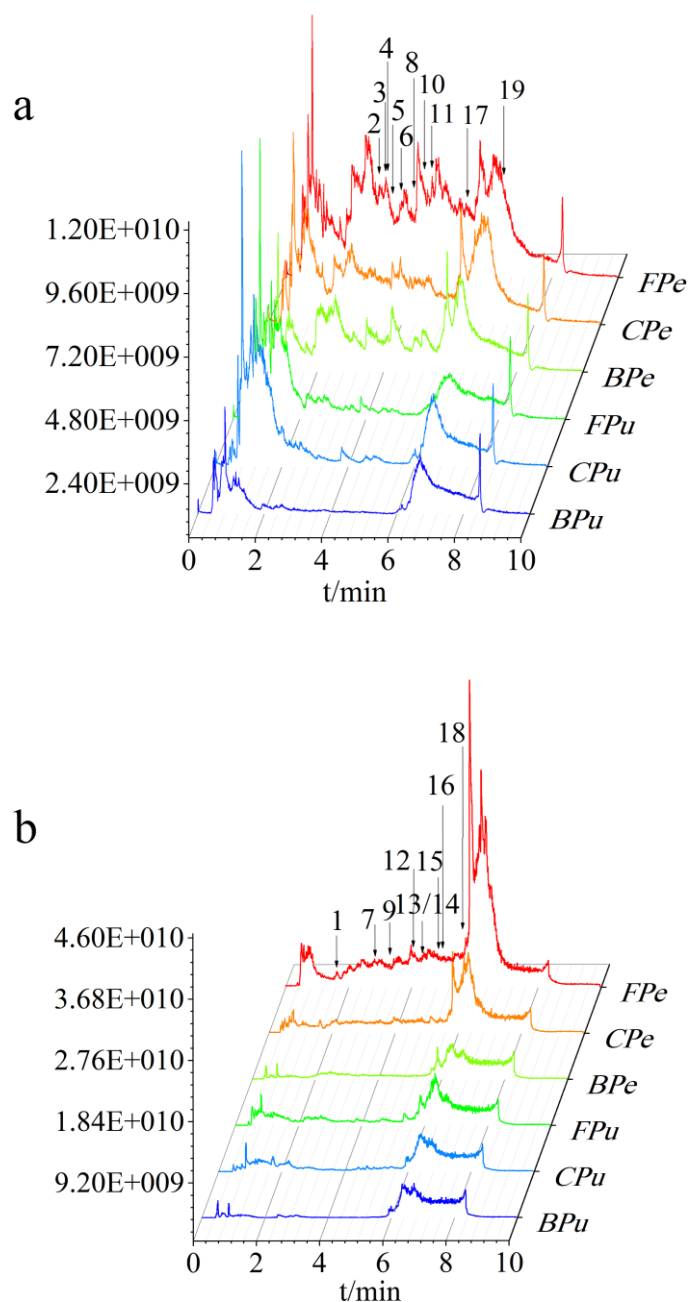

**Figure S1.** Total ion chromatogram in positive (a) and negative (b) ion mode of free, conjugated, and bound phenolic fractions in the peel and pulp of different wampee samples from South China. *FPe*/*FPu*, free phenolic fraction of wampee peel/pulp; *CPe*/*CPu*, conjugated phenolic fraction of wampee peel/pulp; *BPe*/*BPu*, bound phenolic fraction of wampee peel/pulp.
